# Supplementary material for: 3D self-supported porous vanadium-doped nickel nitride nanosheet arrays as efficient bifunctional electrocatalysts for urea electrolysis
Source: Royal Society of Chemistry journal article supplement (doi:10.1039/d0ta09473k), 2021-01-01
Supplement: d0ta09473k1.pdf [file d0ta09473k1.pdf]

**3D self-supported porous vanadium-doped nickel nitride nanosheets arrays as  
efficient bifunctional electrocatalysts for urea electrolysis**

Rui-Qing Li,<sup>\*a</sup> Qi Liu,<sup>a</sup> Yanan Zhou,<sup>\*b</sup> Mengjie Lu,<sup>d</sup> Jinle Hou,<sup>a</sup> Konggang Qu,<sup>a</sup>  
Yachao Zhu,<sup>\*c</sup> and Olivier Fontaine <sup>c</sup>

<sup>a</sup> School of Chemistry and Chemical Engineering, Liaocheng University, Liaocheng  
252059, P. R. China.

<sup>b</sup> School of Chemical Engineering, Sichuan University, Chengdu 610065, P. R. China.

<sup>c</sup> Institute Charles Gerhardt Montpellier, UMR 5253, CC 1502, Université Montpellier,  
Montpellier, France.

<sup>d</sup> Sino-Russian International Joint Laboratory for Clean Energy and Energy Conversion  
Technology, College of Physics, Jilin University, Changchun 130012, P. R. China.

\* Corresponding author: [liruiqing16@163.com](mailto:liruiqing16@163.com); [yananzhou@163.com](mailto:yananzhou@163.com);  
[yachao.scu@hotmail.com](mailto:yachao.scu@hotmail.com)

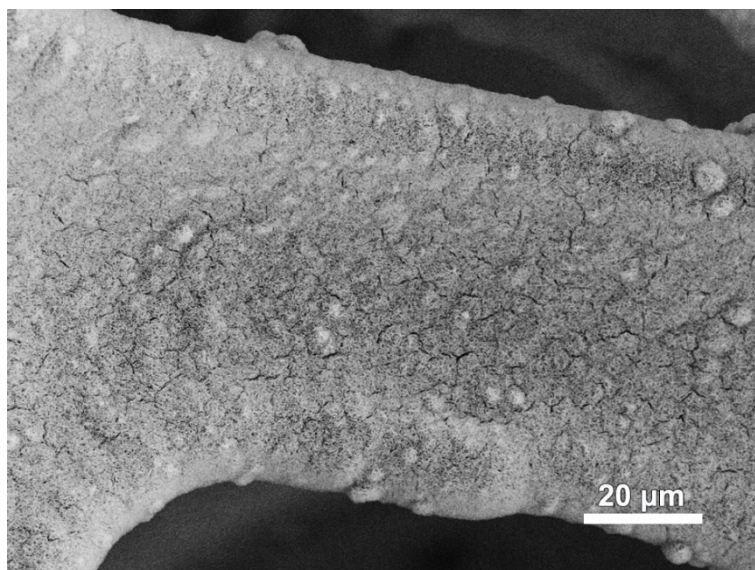

**Fig. S1.** SEM image of V-NiO/NF.

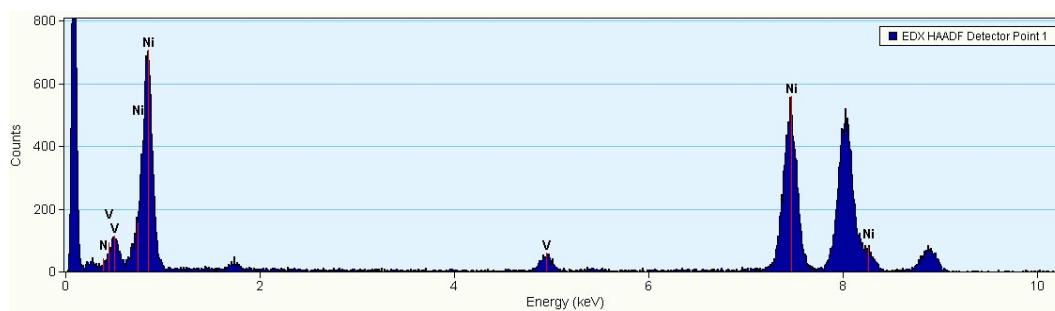

**Fig. S2.** EDX spectrum of V-Ni<sub>3</sub>N/NF.

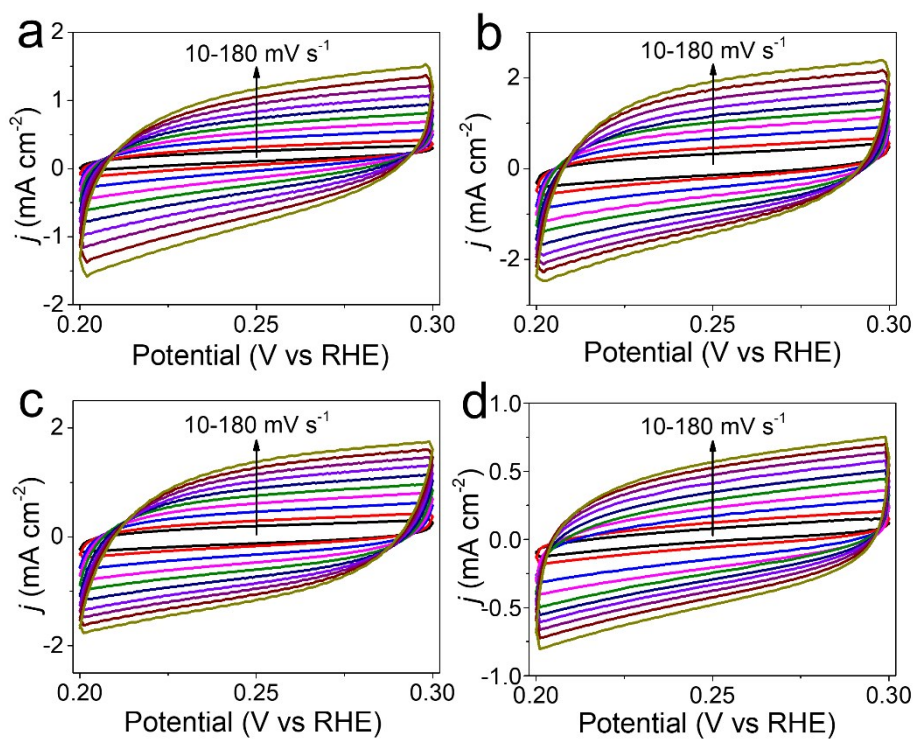

**Fig. S3.** Electrochemical cyclic voltammetry curves of (a) Ni<sub>3</sub>N/NF, (b) V-Ni<sub>3</sub>N/NF, (c) V-Ni<sub>3</sub>N/NF-1, and (d) V-Ni<sub>3</sub>N/NF-2 at different scan rates.

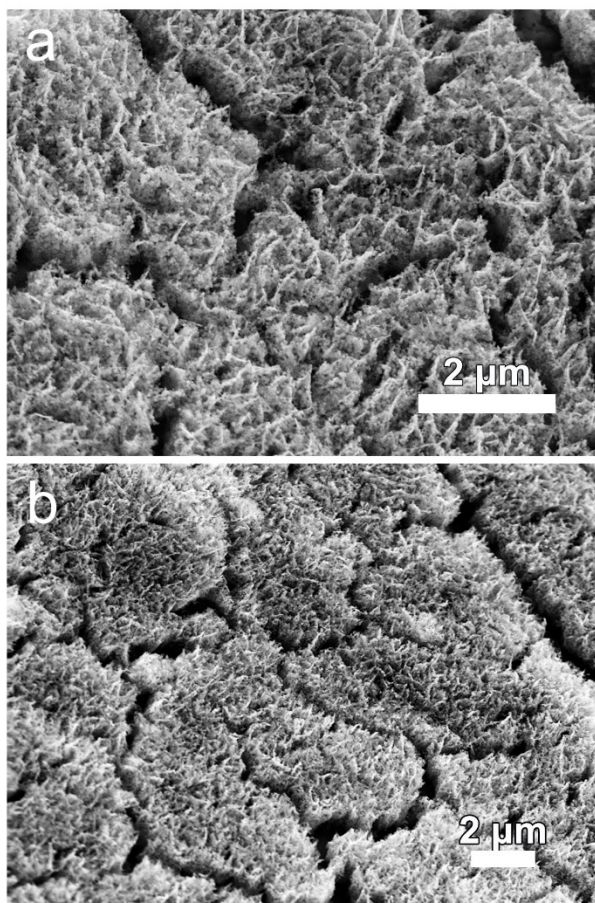

**Fig. S4.** SEM images of V-Ni<sub>3</sub>N/NF after HER stability tests in 1M KOH (a) and 1M PBS (b) electrolyte.

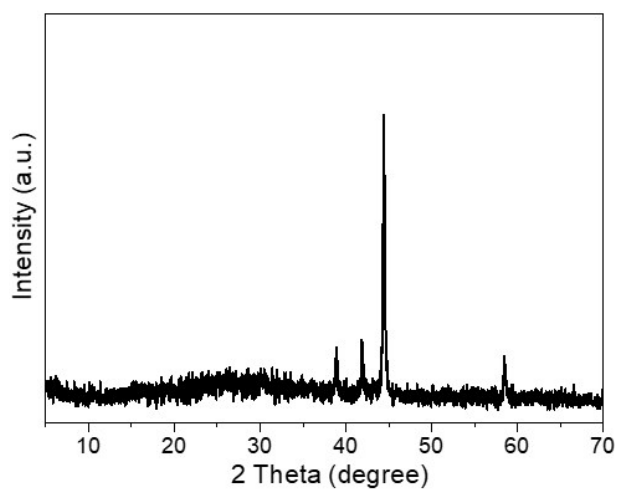

**Fig. S5.** XRD pattern of V-Ni<sub>3</sub>N/NF after the HER stability test in 1M KOH electrolyte.

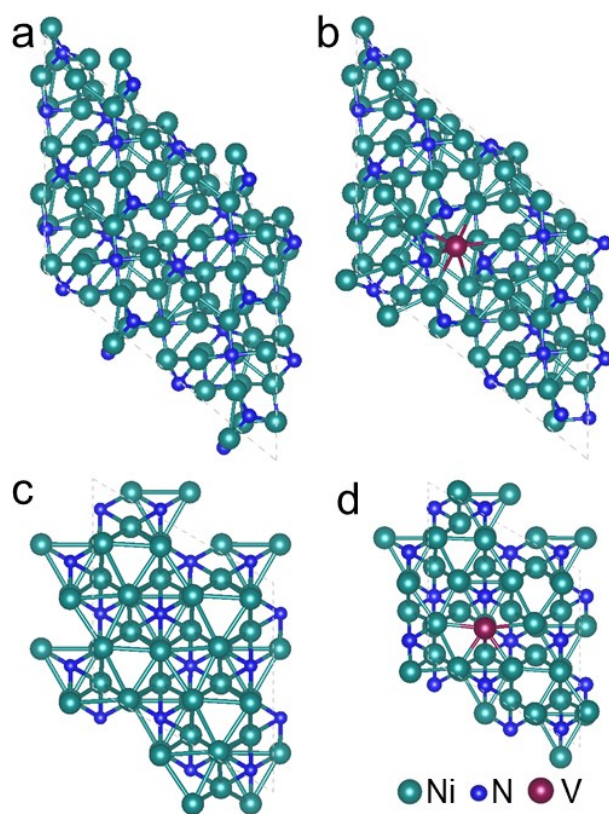

**Fig. S6.** The optimized structural models for (a) Ni<sub>3</sub>N (111), (b) V-Ni<sub>3</sub>N (111), (c) Ni<sub>3</sub>N (002), and (d) V-Ni<sub>3</sub>N (002).

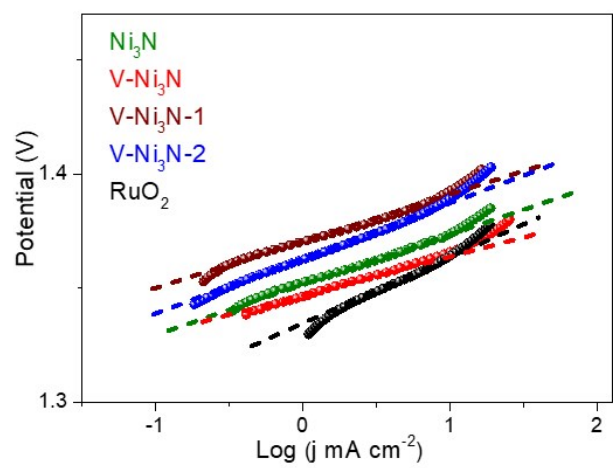

**Fig. S7.** Tafel slopes of UOR for different catalysts.

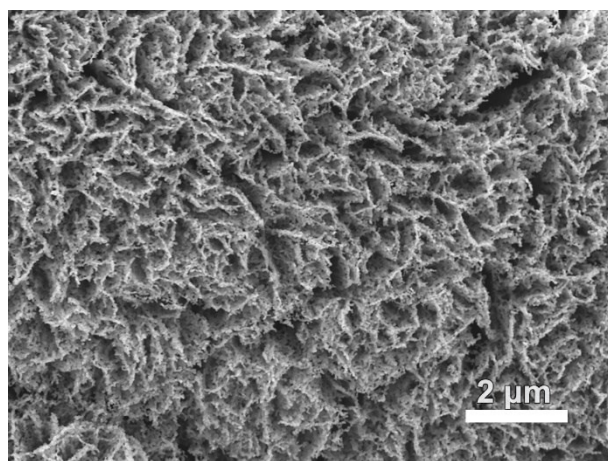

**Fig. S8.** SEM image of V-Ni<sub>3</sub>N/NF after UOR stability test.

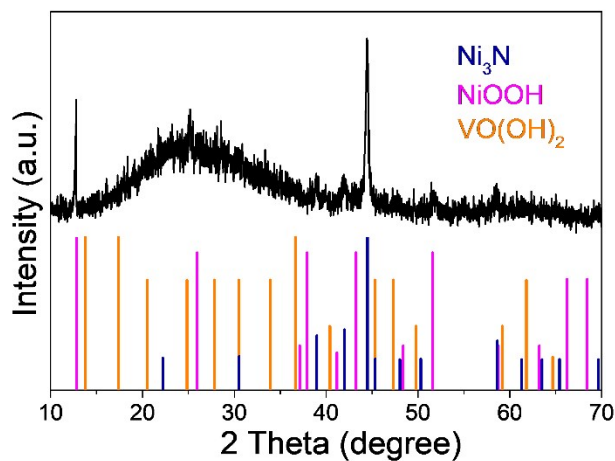

**Fig. S9.** XRD pattern of V-Ni<sub>3</sub>N/NF after UOR stability test.

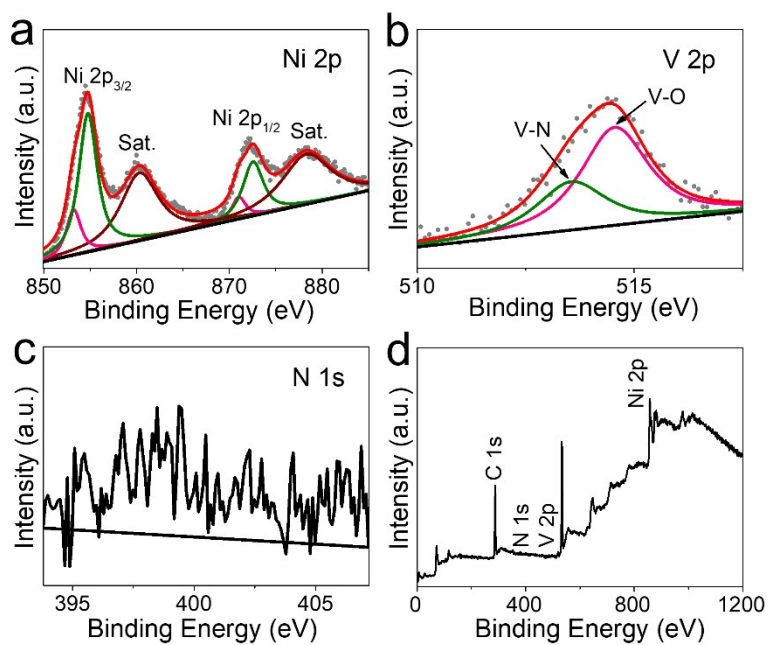

**Fig. S10.** XPS spectra of (a) Ni 2p, (b) V 2p, (c) N 1s, and (d) survey scan for V-Ni<sub>3</sub>N/NF after UOR stability test.

**Table S1** Comparison of the HER performance of V-Ni<sub>3</sub>N/NF with other reported catalysts in alkaline electrolyte.

| Catalysts                                          | Overpotential (mV) at<br>10 mA cm <sup>-2</sup> | Tafel slope (mV<br>dec <sup>-1</sup> ) | References       |
|----------------------------------------------------|-------------------------------------------------|----------------------------------------|------------------|
| <b>V-Ni<sub>3</sub>N/NF</b>                        | <b>83</b>                                       | <b>45</b>                              | <b>This work</b> |
| Co-Ni <sub>3</sub> N                               | 194                                             | 156                                    | [S1]             |
| Ni <sub>3</sub> FeN                                | 94                                              | 90                                     | [S2]             |
| NiCoN/C                                            | 103                                             | --                                     | [S3]             |
| NiCu-NiCuN                                         | 93                                              | 55                                     | [S4]             |
| Co <sub>4</sub> N-VN <sub>1-x</sub> O <sub>x</sub> | 118                                             | 73.6                                   | [S5]             |
| Mo <sub>5</sub> N <sub>6</sub>                     | 94                                              | 66                                     | [S6]             |
| MoNiNC                                             | 110                                             | 65                                     | [S7]             |
| Fe-Ni <sub>3</sub> S <sub>2</sub>                  | 105                                             | 69                                     | [S8]             |
| Mn-Co-P                                            | 86                                              | 52                                     | [S9]             |



**Table S2** Comparison of the UOR performance of V-Ni<sub>3</sub>N/NF with other reported catalysts.

| Catalysts                                          | Potential (V) at 10 mA cm <sup>-2</sup> | References       |
|----------------------------------------------------|-----------------------------------------|------------------|
| <b>V-Ni<sub>3</sub>N/NF</b>                        | <b>1.361</b>                            | <b>This work</b> |
| Ni <sub>2</sub> P                                  | 1.37                                    | [S10]            |
| MnO <sub>2</sub>                                   | 1.37                                    | [S11]            |
| Ni(OH) <sub>2</sub>                                | 1.42                                    | [S12]            |
| NF-G-Mn                                            | 1.37                                    | [S13]            |
| NiMoO                                              | 1.37                                    | [S14]            |
| Ni <sub>3</sub> Se <sub>4</sub>                    | 1.38                                    | [S15]            |
| MnO <sub>2</sub> /MnCo <sub>2</sub> O <sub>4</sub> | 1.43                                    | [S16]            |
| Pt/C                                               | 1.38                                    | [S17]            |

**Table S3** Comparison of the urea electrolysis performance of V-Ni<sub>3</sub>N/NF with other recently reported catalysts.

| Catalysts                                          | Voltage (V) at 10 mA cm <sup>-2</sup> | References       |
|----------------------------------------------------|---------------------------------------|------------------|
| <b>V-Ni<sub>3</sub>N/NF</b>                        | <b>1.416</b>                          | <b>This work</b> |
| Ni-Mo alloy                                        | 1.43                                  | [S18]            |
| CoMn/CoMn <sub>2</sub> O <sub>4</sub>              | 1.51                                  | [S19]            |
| Ni/C                                               | 1.6                                   | [S20]            |
| NiCoP                                              | 1.42                                  | [S21]            |
| MnO <sub>2</sub> /MnCo <sub>2</sub> O <sub>4</sub> | 1.58                                  | [S22]            |
| NiCo <sub>2</sub> S <sub>4</sub>                   | 1.49                                  | [S23]            |
| Ni <sub>2</sub> P/Fe <sub>2</sub> P                | 1.47                                  | [S24]            |
| Fe-Ni <sub>3</sub> S <sub>2</sub>                  | 1.46                                  | [S25]            |
| Pt/C                                               | 1.68                                  | [S26]            |

## References

- [S1] C. Zhu, A. Wang, W. Xiao, D. Chao, X. Zhang, N. Tiep, S. Chen, J. Kang, X. Wang, J. Ding, J. Wang, H. Zhang and H. Fan, *Adv. Mater.*, 2018, **30**, 1705516.
- [S2] Y. Gu, S. Chen, J. Ren, Y. Jia, C. Chen, S. Komarneni, D. Yang and X. Yao, *ACS Nano*, 2018, **12**, 245.
- [S3] J. Lai, B. Huang, Y. Chao, X. Chen and S. Guo, *Adv. Mater.*, 2019, **31**, 1805541.
- [S4] J. Hou, Y. Sun, Z. Li, B. Zhang, S. Cao, Y. Wu, Z. Gao and L. Sun, *Adv. Funct. Mater.*, 2018, **28**, 1803278.
- [S5] S. Dutta, A. Indra, Y. Feng, H. Han and T. Song, *Appl. Catal. B: Environ.*, 2019,

241, 521.

- [S6] H. Jin, X. Liu, A. Vasileff, Y. Jiao, Y. Zhao, Y. Zheng and S. Qiao, *ACS Nano*, 2018, **12**, 12761.
- [S7] F. Wang, Y. Sun, Y. He, L. Liu, J. Xu, X. Zhao, G. Yin, L. Zhang, S. Li, Q. Mao, Y. Huang, T. Zhang and B. Liu, *Nano Energy*, 2017, **37**, 1.
- [S8] W. Zhang, Q. Jia, H. Liang, L. Cui, D. Wei and J. Liu, *Chem. Eng. J.*, 2020, **396**, 125315.
- [S9] T. Liu, X. Ma, D. Liu, S. Hao, G. Du, Y. Ma, A. Asiri, X. Sun and L. Chen, *ACS Catal.*, 2017, **7**, 98.
- [S10] D. Liu, T. Liu, L. Zhang, F. Qu, A. Asiri and X. Sun, *J. Mater. Chem. A.*, 2017, **5**, 3208.
- [S11] S. Chen, J. Duan, A. Vasileff and S. Qiao, *Angew. Chem. Int. Ed.*, 2016, **55**, 3804.
- [S12] X. Zhu, X. Dou, J. Dai, X. An, Y. Guo, L. Zhang, S. Tao, J. Zhao, W. Chu, X. Zeng, C. Wu and Y. Xie, *Angew. Chem. Int. Ed.*, 2016, **55**, 12465.
- [S13] S. Chen, J. Duan, A. Vasileff and S. Qiao, *Angew. Chem. Int. Ed.*, 2016, **55**, 3804.
- [S14] Z. Yu, C. Lang, M. Gao, Y. Chen, Q. Fu, Y. Duan and S. Yu, *Energy Environ. Sci.*, 2018, **11**, 1890.
- [S15] J. Zhang, X. Tian, T. He, S. Zaman, M. Miao, Y. Yan, K. Qi, Z. Dong, H. Liu and B. Xia, *J. Mater. Chem. A.*, 2018, **6**, 15653.
- [S16] C. Xiao, S. Li, X. Zhang and D. MacFarlane, *J. Mater. Chem. A*, 2017, **5**, 7825.
- [S17] S. Chen, J. Duan, A. Vasileff and S. Qiao, *Angew. Chem. Int. Ed.*, 2016, **55**, 3804.
- [S18] J. Zhang, T. He, M. Wang, R. Qi, Y. Yan, Z. Dong, H. Liu, H. Wang and B. Xia, *Nano Energy*, 2019, **60**, 894.
- [S19] C. Wang, H. Lu, Z. Mao, C. Yan, G. Shen and X. Wang, *Adv. Funct. Mater.*, 2020, **30**, 2000556.
- [S20] L. Wang, L. Ren, X. Wang, X. Feng, J. Zhou and B. Wang, *ACS Appl. Mater. Interfaces*, 2018, **10**, 4750.
- [S21] L. Sha, J. Yin, K. Ye, G. Wang, K. Zhu, K. Cheng, J. Yan, G. Wang and D. Cao, *J. Mater. Chem. A*, 2019, **7**, 9078.
- [S22] C. Xiao, S. Li, X. Zhang and D. MacFarlane, *J. Mater. Chem. A*, 2017, **5**, 7825.
- [S23] W. Zhu, M. Ren, N. Hu, W. Zhang, Z. Luo, R. Wang, J. Wang, L. Huang, Y. Suo and J. Wang, *ACS Sustainable Chem. Eng.*, 2018, **6**, 5011.
- [S24] L. Yan, Y. Sun, E. Hu, J. Ning, Y. Zhong, Z. Zhang and Y. Hu, *J. Colloid Interf.*

*Sci.*, 2019, **541**, 279.

[S25] W. Zhu, Z. Yue, W. Zhang, N. Hu, Z. Luo, M. Ren, Z. Xu, Z. Wei and Y. Suo, J. Wang, *J. Mater. Chem. A*, 2018, **6**, 4346.

[S26] S. Chen, J. Duan, A. Vasileff and S. Qiao, *Angew. Chem. Int. Ed.*, 2016, **55**, 3804.
